# Supplementary material for: Reinduction of an Anti-EGFR-based First-line Regimen in Patients with RAS Wild-type Metastatic Colorectal Cancer Enrolled in the Valentino Study
Source: PubMed Central journal article supplement — Oncologist. 2022 Jan 25;27(1):e29–36. doi: 10.1093/oncolo/oyab012 (PMC8842305; doi:10.1093/oncolo/oyab012), 2022-01-25

**Supplemental Figure S1. Distribution of propensity scores before and after matching in the two cohorts.** The histograms plot in panel A and the jitter plot in panel B illustrate the distribution of the propensity score before and after matching.

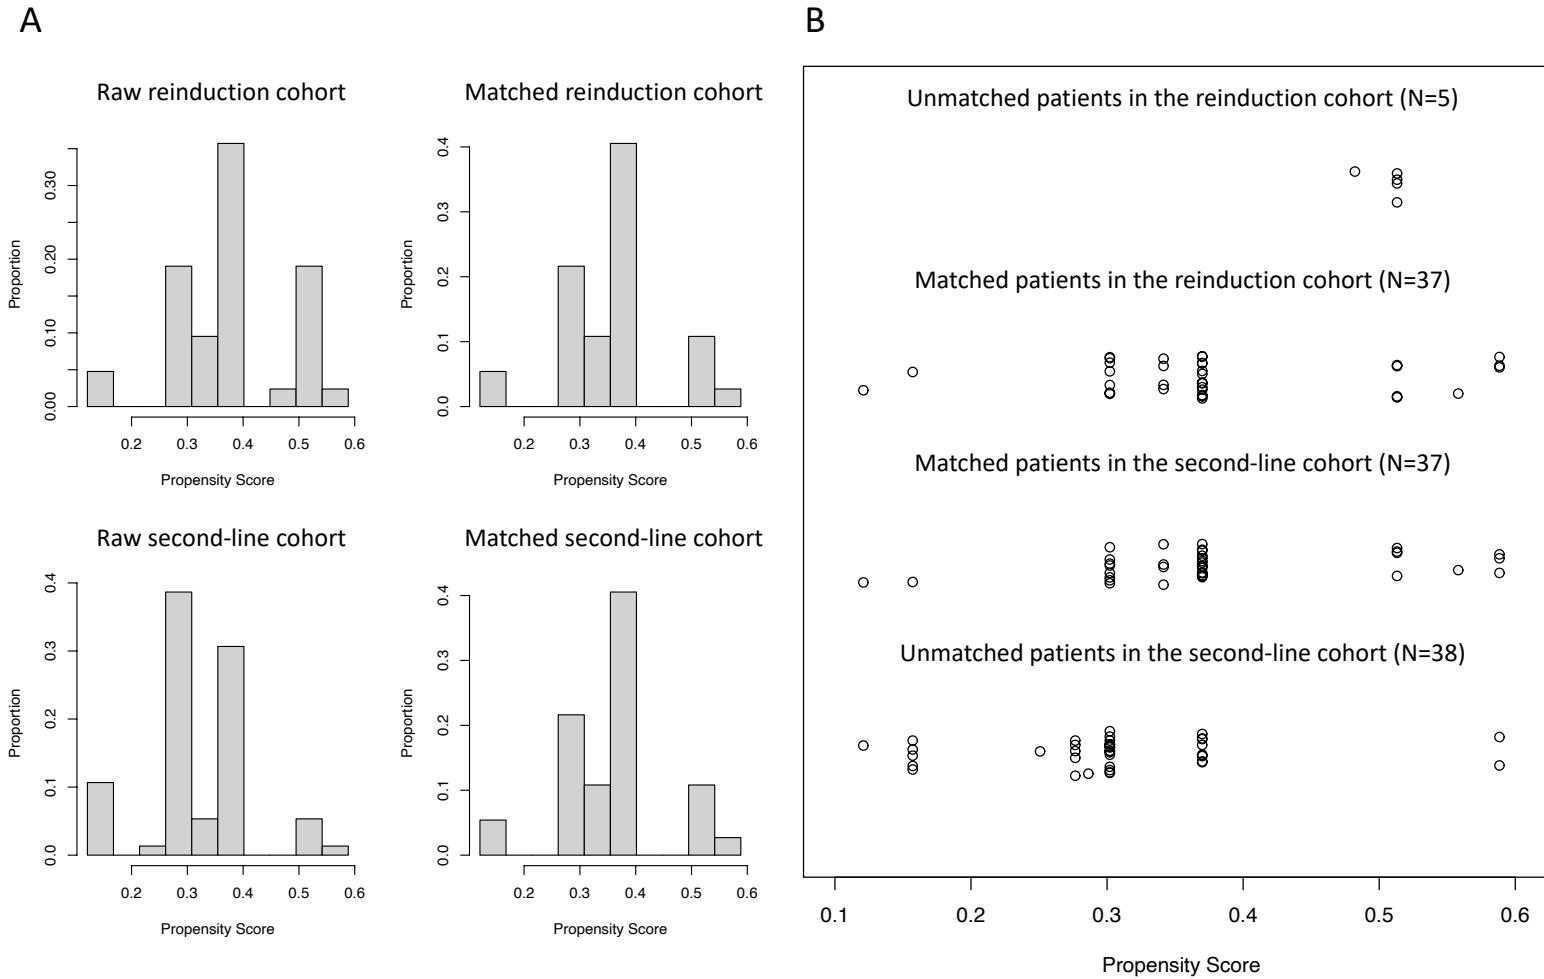

Supplement: oyab012_suppl_supplemental_figure_s1.pdf [file oyab012_suppl_supplemental_figure_s1.pdf]
