# Supplementary material for: Reinduction of an Anti-EGFR-based First-line Regimen in Patients with RAS Wild-type Metastatic Colorectal Cancer Enrolled in the Valentino Study
Source: PubMed Central journal article supplement — Oncologist. 2022 Jan 25;27(1):e29–36. doi: 10.1093/oncolo/oyab012 (PMC8842305; doi:10.1093/oncolo/oyab012), 2022-01-25

**Supplemental Figure S4. Dot plot showing the standardized log-rank statistic for OS according to DFI.**

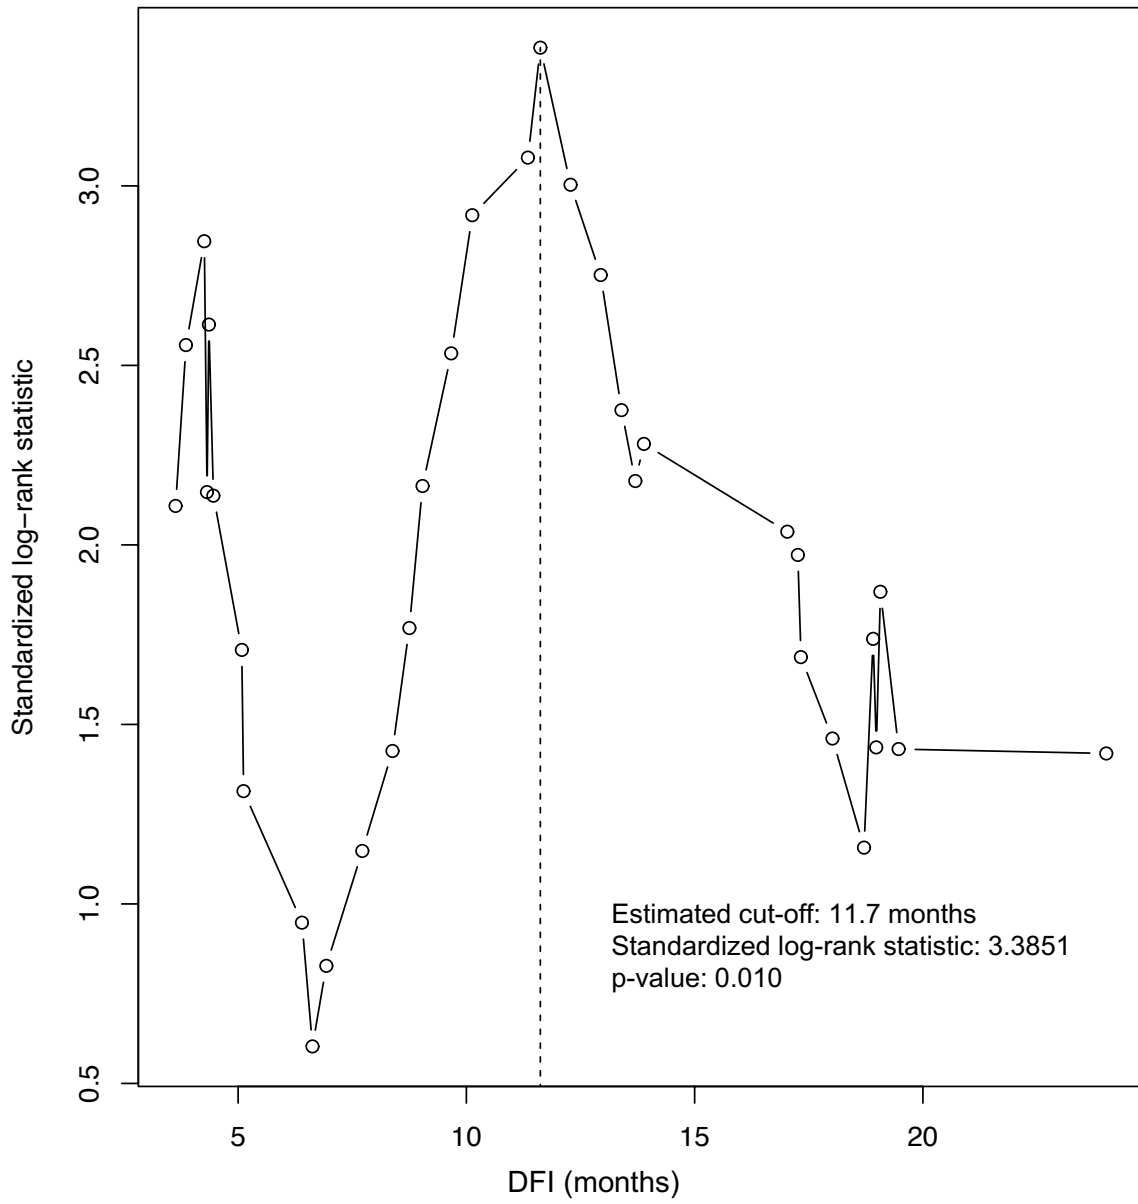

Supplement: oyab012_suppl_supplemental_figure_s4.pdf [file oyab012_suppl_supplemental_figure_s4.pdf]
